# Supplementary material for: Chemical composition and antioxidant potential of Pyropia spiralis and Sargassum natans through a biorefinery-based extraction
Source: Research Square preprint supplement (doi:10.21203/rs.3.rs-7142471/v1), 2025-07-23
Supplement: Supplementary file 1 [file e11b68304f4872069a3ea97d.docx]

Online Resource

**Table S1** – Summary of the respective standard curve for chemical characterization (proteins, carbohydrates, sulfur content, and phenolic compounds) and antioxidant assays (ABTS and FRAP), specifying the references compounds used as standard, standard concentration range (μg mL-1), linear equation (y = ax + b), regression coefficient (R2), and conversion factor (CF).

| Assay | Standard compound | | |
| --- | --- | --- | --- |
|  | BSA |  |  |
| Proteins | 2 - 16 µg mL-1 |  |  |
| y = 0.0546x + 0.0098 | - | - |
| R² = 0.9718 |  |  |
|  | Galactose | Fucose | Glucose |
| Carbohydrates | 20 - 60 µg mL-1 | 50 - 200 µg mL-1 | 15 - 75 µg mL-1 |
| y = 0.0132x - 0.0137 | y = 0.0032x + 0.0034 | y = 0.0156x - 0.0111 |
| R² = 0.9893 | R² = 0.9932 | R² = 0.9844 |
| CF = 1 | CF = 4.125 | CF = 0.846 |
|  | Sodium sulfate |  |  |
| Sulfur content | 160 - 800 µg mL-1 |  |  |
| y = 0.0014x + 0.1334 | - | - |
| R² = 0.9588 |  |  |
|  | Gallic acid | Trolox | Phloroglucinol |
| Phenolic compounds | 2 – 10 µg mL-1 | 2 – 10 µg mL-1 | 2 – 10 µg mL-1 |
| y = 0.0699x - 0.0192 | y = 0.0859x - 0.0328 | y = 0.0494x - 0.0103 |
| R² = 0.991 | R² = 0.9954 | R² = 0.9966 |
| CF = 1 | CF = 0.814 | CF = 1.415 |
| ABTS | 0.4 – 2 µg mL-1 | 2.4 – 12 µg mL-1 | 0.35 – 1.75 µg mL-1 |
| y = -0.4171x + 0.9 | y = -0.0828x + 0.8667 | y = -0.401x + 0.918 |
| R² = 0.9866 | R² = 0.942 | R² = 0.9464 |
| CF = 1 | CF = 5.037 | CF = 1.04 |
| FRAP | 0.7 – 3.5 µg mL-1 | 1.6 – 8 µg mL-1 | 2 - 10 µg mL-1 |
| y = 0.5182x + 0.054 | y = 0.1396x - 0.0002 | y = 0.12x + 0.0443 |
| R² = 0.9934 | R² = 0.9957 | R² = 0.9942 |
| CF = 1 | CF = 3.712 | CF = 4.318 |

*To convert between different standard equivalents (*e.g*., galactose, glucose, fucose, gallic acid, trolox, or phloroglucinol), multiply the original value by the appropriate conversion factor (CF); for reverse conversions, divide the value by the same factor

**Table S2** – Statistical bifactorial ANOVA results for extract yield (%), proteins (μg BSA mg-1), phenolic compounds (μg GAE mg-1), carbohydrates (μg GAL mg-1), sulfate content (%), ABTS and FRAP (mg GAE mg-1), EC50 (mg mL-1), total proteins index, total carbohydrates index, phenolic compounds index, and total antioxidant index of *P. spiralis* and *S. natans* for all extracts (*n* = 5). SS – square sum, DF – degree of freedom, MS – medium square, *F* – statistic index, *p* – probability. Bold *p* values represent statistical differences (*p* < 0.05).

| Parameters | | Factors | | SS | | DF | | MS | | *F* | | *p* | |
| --- | --- | --- | --- | --- | --- | --- | --- | --- | --- | --- | --- | --- | --- |
| Extract yield | | Species | | 0.02 | | 1 | | 0.02 | | 30.23 | | **<0.001** | |
| Extracts | | 1.239 | | 4 | | 0.31 | | 466.98 | | **<0.001** | |
| Species x Extracts | | 0.754 | | 4 | | 0.189 | | 284.24 | | **<0.001** | |
| Error | | 0.027 | | 40 | | 0.001 | |  | |  | |
| Protein content | | Species | | 111.404 | | 1 | | 111.404 | | 308.271 | | **<0.001** | |
| Extracts | | 358.673 | | 3 | | 119.558 | | 330.835 | | **<0.001** | |
| Species x Extracts | | 20.068 | | 3 | | 6.689 | | 18.511 | | **<0.001** | |
| Error | | 11.564 | | 32 | | 0.361 | |  | |  | |
| Phenolic compounds | | Species | | 25.274 | | 1 | | 25.274 | | 10.558 | | **0.003** | |
| Extracts | | 265.405 | | 3 | | 88.468 | | 36.957 | | **<0.001** | |
| Species x Extracts | | 233.966 | | 3 | | 77.989 | | 32.579 | | **<0.001** | |
| Error | | 76.602 | | 32 | | 2.394 | |  | |  | |
| Carbohydrates | | Species | | 55845.899 | | 1 | | 55845.899 | | 126.016 | | **<0.001** | |
| Extracts | | 67537.765 | | 3 | | 22512.588 | | 50.8 | | **<0.001** | |
| Species x Extracts | | 82868.056 | | 3 | | 27622.685 | | 62.33 | | **<0.001** | |
| Error | | 14181.294 | | 32 | | 443.165 | |  | |  | |
| Sulfate content | | Species | | 0.716 | | 1 | | 0.716 | | 87.119 | | **<0.001** | |
| Extracts | | 0.823 | | 3 | | 0.274 | | 33.405 | | **<0.001** | |
| Species x Extracts | | 0.972 | | 3 | | 0.324 | | 39.416 | | **<0.001** | |
| Error | | 0.263 | | 32 | | 0.008 | |  | |  | |
| ABTS | | Species | | 4.977 | | 1 | | 4.977 | | 75.799 | | **<0.001** | |
| Extracts | | 106.241 | | 3 | | 35.414 | | 539.362 | | **<0.001** | |
| Species x Extracts | | 10.407 | | 3 | | 3.469 | | 52.833 | | **<0.001** | |
| Error | | 2.101 | | 32 | | 0.066 | |  | |  | |
| FRAP | Species | | 50.212 | | 1 | | 50.212 | | 495.733 | | **<0.001** | |
| Extracts | | 33.872 | | 3 | | 11.291 | | 111.469 | | **<0.001** | |
| Species x Extracts | | 6.895 | | 3 | | 2.298 | | 22.692 | | **<0.001** | |
| Error | | 3.241 | | 32 | | 0.101 | |  | |  | |
| ABTS EC50 | Species | | 0.177 | | 1 | | 0.177 | | 151.993 | | **<0.001** | |
| Extracts | | 0.569 | | 2 | | 0.285 | | 244.119 | | **<0.001** | |
| Species x Extracts | | 0.123 | | 2 | | 0.061 | | 52.614 | | **<0.001** | |
| Error | | 0.028 | | 24 | | 0.001 | |  | |  | |
| Total proteins index | Species | | 5409103.1 | | 1 | | 5409103.1 | | 153.303 | | **<0.001** | |
| Extracts | | 13442650.6 | | 3 | | 4480883.5 | | 126.996 | | **<0.001** | |
| Species x Extracts | | 3735236 | | 3 | | 1245078.7 | | 35.288 | | **<0.001** | |
| Error | | 1129081.5 | | 32 | | 35283.8 | |  | |  | |
| Total carbohydrates index | Species | | 7.70E+09 | | 1 | | 7.70E+09 | | 168.518 | | **<0.001** | |
| Extracts | | 1.83E+10 | | 3 | | 6.09E+09 | | 133.163 | | **<0.001** | |
| Species x Extracts | | 1.72E+10 | | 3 | | 5.74E+09 | | 125.528 | | **<0.001** | |
| Error | | 1.46E+09 | | 32 | | 4.57E+07 | |  | |  | |
| Phenolic compounds index | Species | | 513489.8 | | 1 | | 513489.8 | | 1.782 | | 0.191 | |
| Extracts | | 42633557.2 | | 3 | | 14211185.7 | | 49.316 | | **<0.001** | |
| Species x Extracts | | 14385580.3 | | 3 | | 4795193.4 | | 16.641 | | **<0.001** | |
| Error | | 9221222 | | 32 | | 288163.2 | |  | |  | |
| Total antioxidant potential index | Species | | 1554.8 | | 1 | | 1554.754 | | 0.7188 | | 0.403 | |
| Extracts | | 481803.5 | | 3 | | 160601.152 | | 74.249 | | **<0.001** | |
| Species* Extracts | | 9647.2 | | 3 | | 3215.719 | | 1.4867 | | 0.237 | |
| Error | | 69216.3 | | 32 | | 2163.009 | |  | |  | |

**Table S3** – Multifactorial ANOVA for Band 200-230 and 230-280 nm and bifactorial ANOVA for Band 400-430 and 660-690 nm (AUC) of *P. spiralis* and *S. natans* for all extracts(*n* = 5). SS – square sum, DF – degree of freedom, MS – medium square, *F* – statistic index, *p* – probability. Bold *p* values represent statistical differences (*p* < 0.05).

| ANOVA | Factors | SS | DF | MS | *F* | *p* |
| --- | --- | --- | --- | --- | --- | --- |
| Multifactorial  (Band 200-230 and 230-280 nm) | Species | 6772.365 | 1 | 6772.4 | 30.335 | **<0.001** |
| Band | 11726.081 | 1 | 11726.1 | 52.524 | **<0.001** |
| Extract | 89197.466 | 3 | 29732.5 | 133.178 | **<0.001** |
| Species x Band | 1788.375 | 1 | 1788.4 | 8.011 | **0.006** |
| Species x Extract | 20986.368 | 3 | 6995.5 | 31.334 | **<0.001** |
| Band x Extract | 44154.957 | 3 | 14718.3 | 65.927 | **<0.001** |
| Species x Band x Extract | 6797.995 | 3 | 2266.0 | 10.150 | **<0.001** |
| Error | 14288.204 | 64 | 223.3 |  |  |
| Bifactorial  (Band 400-430 and 660-690 nm) | Species | 1629.807 | 1 | 1629.81 | 19.1912 | **<0.001** |
| Band | 5394.255 | 1 | 5394.25 | 63.5181 | **<0.001** |
| Species x Band | 364.043 | 1 | 364.04 | 4.2867 | **0.050** |
| Error | 1358.796 | 16 | 84.92 |  |  |
